# Supplementary material for: HIF-1α/YAP Signaling Rewrites Glucose/Iodine Metabolism Program to Promote Papillary Thyroid Cancer Progression
Source: PubMed Central journal article supplement (PMC9760428; doi:10.7150/ijbs.75459), 2023-01-01
Supplement: ijbsv19p0225s1.pdf [file ijbsv19p0225s1.pdf]

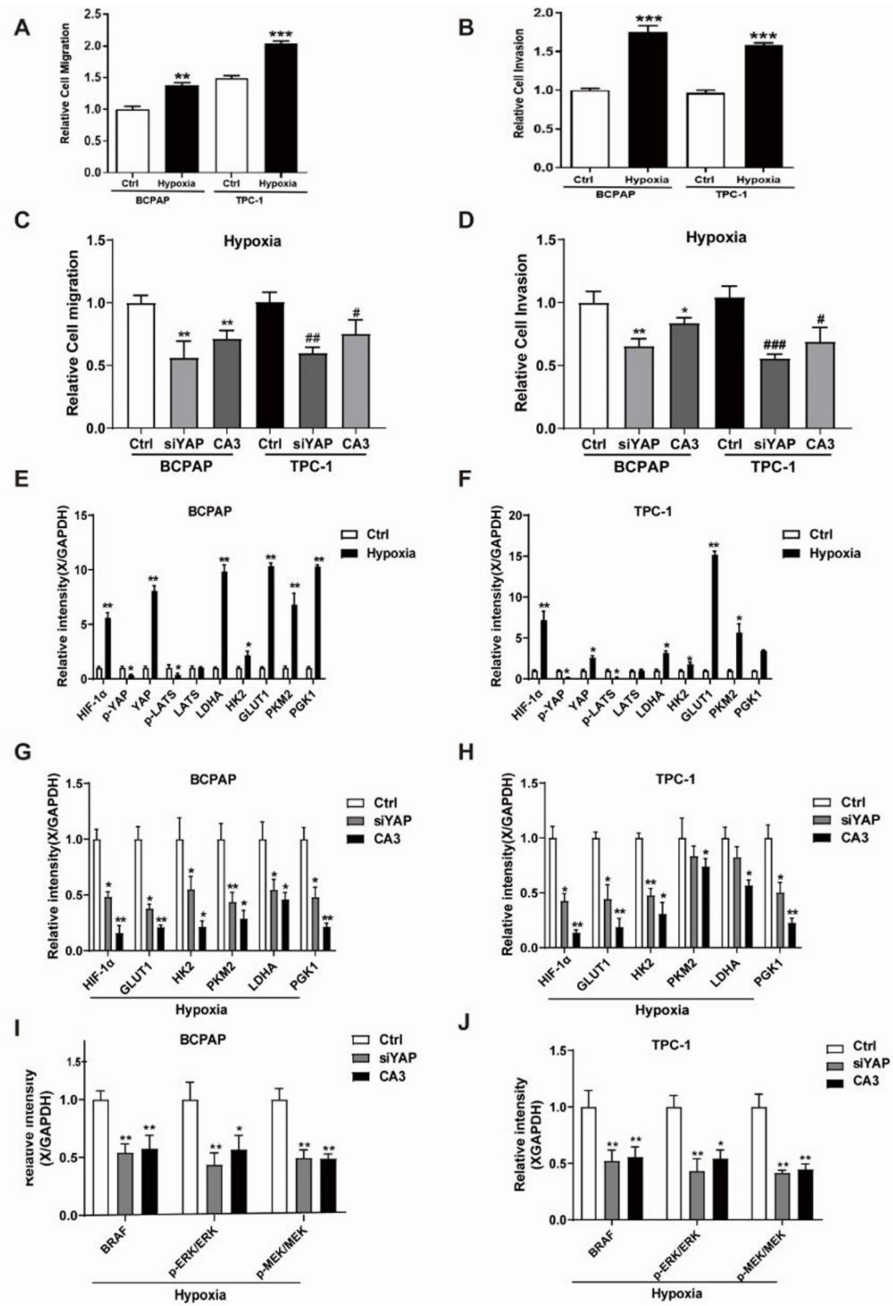

**Figure S1.**

Semi-quantitative histogram of Western blot proteins. (A-B) Migration and invasion assays in BCPAP and TPC-1 cells under normoxia (20% O<sub>2</sub>) or hypoxia (1% O<sub>2</sub>) for 24h. (C-D) Western blot showed the expression of HIF-1a, YAP, LATS, LDHA, HK2, GLUT1, PKM2, and PGK1 proteins in BCPAP and TPC-1 cells under normoxia (20%O<sub>2</sub>) or hypoxia (1%O<sub>2</sub>) for 24h, respectively. (E-F) Migration and invasion assays in BCPAP and TPC-1 cells under hypoxia (1% O<sub>2</sub>) for 24h after transfected with YAP siRNA or the use of the inhibitor CA3. (G-H) Western blot showed the expression of HIF-1a, GLUT1, HK2, PKM2, LDHA and PGK1 proteins in BCPAP

and TPC-1 cells under hypoxia (1%O<sub>2</sub>) for 24h with the inhibition of YAP. (I-J) Western blot showed the expression of BRAF, p-ERK/ERK and p-MEK/MEK proteins in PTC cells under hypoxia (1%O<sub>2</sub>) for 24h with the inhibition of YAP.

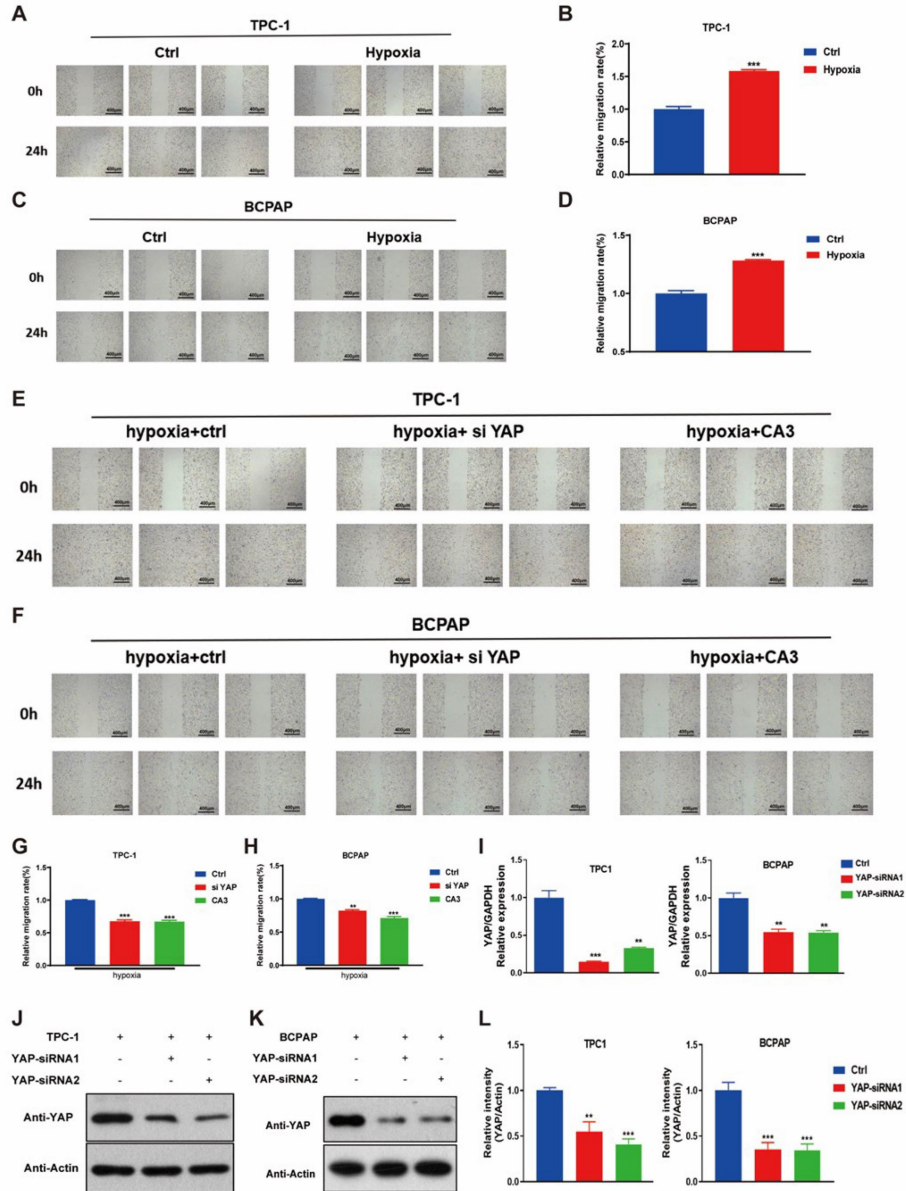

**Figure S2.**

(A-D) Migration and invasion assays in BCPAP and TPC-1 cells under normoxia (20% O<sub>2</sub>) or hypoxia (1% O<sub>2</sub>) for 24h (wound healing assays). Data are shown as the mean ± SEM of three independent experiments. (E-H) Migration and invasion assays in BCPAP and TPC-1 cells under hypoxia (1% O<sub>2</sub>) for 24h after transfected with YAP siRNA or the use of the inhibitor CA3. (wound healing assays). (I-L) Real-time PCR and western blot were used to examine knockdown

efficiency of YAP in BCPAP and TPC-1 cells transfected with YAP siRNA. \*\*p < 0.01, \*\*\*p < 0.001.

**Supplementary Table 1.**

**Information about the western blotting antibodies in the study**

| <b>Antibody Name</b>          | <b>Source</b> | <b>Dilution Ratio</b> | <b>Company</b> | <b>Item Number</b> |
|-------------------------------|---------------|-----------------------|----------------|--------------------|
| GLUT1                         | rabbit        | 1:2000                | abcam          | ab15730            |
| HIF-1 $\alpha$                | mouse         | 1:1000                | cst            | #79233T            |
| Sodium Iodide Symporter (NIS) | rabbit        | 1:1000                | abcam          | ab83816            |
| p-YAP                         | rabbit        | 1:1000                | cst            | #13008             |
| YAP                           | rabbit        | 1:1000                | cst            | #14074T            |
| p-LATS                        | rabbit        | 1:1000                | cst            | 9157S              |
| LATS                          | rabbit        | 1:1000                | abcam          | ab243656           |
| LDHA                          | rabbit        | 1:1000                | cst            | 3582               |
| HK2                           | rabbit        | 1:1000                | cst            | #2867              |
| PKM2                          | rabbit        | 1:1000                | abcam          | ab137852           |
| PGK1                          | rabbit        | 1:1000                | abcam          | ab199438           |
| Flag                          | mouse         | 1:1000                | proteintech    | 66008-2-ig         |
| Histone H3                    | rabbit        | 1:1000                | abcam          | ab5103             |
| GAPDH                         | mouse         | 1:20000               | cst            | #5174              |
| Anti-mouse IgG(HRP)           |               | 1:5000                | cst            | #7076              |
| Anti-rabbit IgG(HRP)          |               | 1:5000                | cst            | #7074              |

## Supplementary file 1.

### Real-time PCR primers

|                |                                                    |
|----------------|----------------------------------------------------|
| YAP            | Forward: 5'-TAGCCCTGCGTAGCCAGTTA-3'                |
|                | Reverse: 5'-TCATGCTTAGTCCACTGTCTGT-3'              |
| HIF-1 $\alpha$ | Forward: 5'-ATCCATGTGACCATGAGGAAATG-3'             |
|                | Reverse: 5'-TCGGCTAGTTAGGGTACACTTC-3'              |
| GLUT1          | Forward: 5'-TCTGGCATCAACGCTGTCTTC-3'               |
|                | Reverse: 5'-CGATACCGGAGCCAATGGT-3'                 |
| HK2            | Forward: 5'-TTGACCAGGAGATTGACATGGG-3'              |
|                | Reverse: 5'-CAACCGCATCAGGACCTCA-3'                 |
| PKM2           | Forward: 5'-ATAACGCCTACATGGAAAAGTGT-3'             |
|                | Reverse: 5'-TAAGCCCATCATCCACGTAGA-3'               |
| LDHA           | Forward: 5'-ATGGCAACTCTAAAGGATCAGC-3'              |
|                | Reverse: 5'-CCAACCCCAACAAGTGAATCT-3'               |
| PGK1           | Forward: 5'-GACCTAATGTCCAAAGCTGAGAA-3'             |
|                | Reverse: 5'-CAGCAGGTATGCCAGAAGCC-3'                |
| NIS            | Forward: 5'-CCTATCGCTATGGCCTCAAGT-3'               |
|                | Reverse: 5'-CGTGGCTACAATGTACTGCAAA-3'              |
| GAPDH          | Forward: 5'-GGAGCGAGATCCCTCCAAAAT-3'               |
|                | Reverse: 5'-GGCTGTTGTCATACTTCTCATGG-3'             |
| GLUT1-WT       | Forward: 5'-CTTACGCGTGCTAGCCTGGTCGGCTCAGCCTCCCG-3' |
|                | Reverse: 5'-CGGAATGCCAAGCTTCTGTCCTGGGCGGCGCTCTG-3' |
| GLUT1-mut      | Forward: 5'-CCGAAGCTCATTACTGCACTCCAGCCTGG-3'       |
|                | Reverse: 5'-GCAGTAATGAGCTTCGGCTCACTGTAACC-3'       |
